# Supplementary material for: Analytical Quality by Design (AQbD) Approach to the Development of In Vitro Release Test for Topical Hydrogel
Source: MDPI journal article supplement (doi:10.3390/pharmaceutics14040707), 2022-03-26
Supplement: s1 [file s1]

# Supplementary Materials: Analytical quality by design (AQbD) approach to the development of in vitro release test for topical hydrogel

Réka Szoleczky, Mária Budai-Szűcs, Erzsébet Csányi, Szilvia Berkó, Péter Tonka-Nagy, Ildikó Csóka and Anita Kovács\*

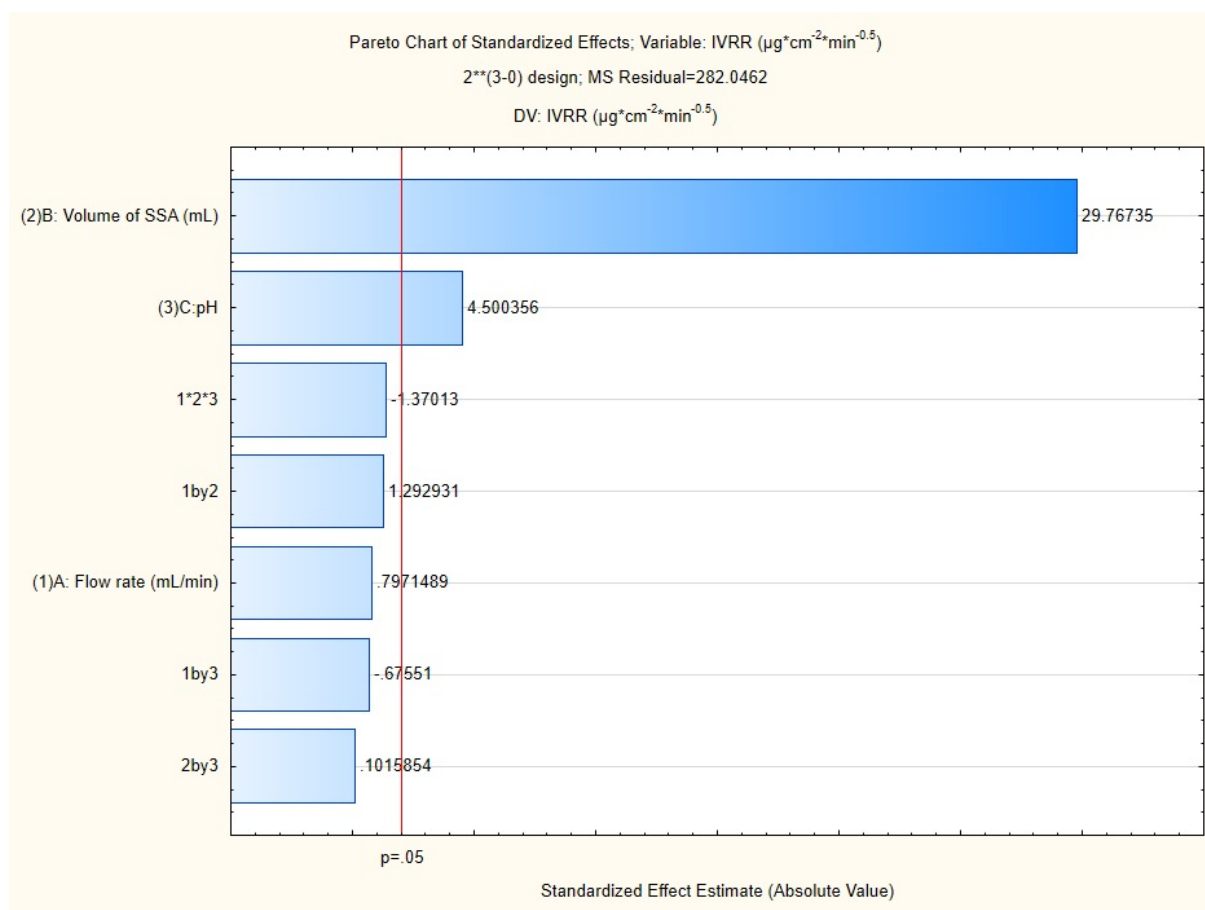

**Figure S1.** Standard Pareto chart showing the effects of independent variables on in vitro release rate (IVRR) ( $\mu\text{g}\cdot\text{cm}^{-2}\cdot\text{min}^{-0.5}$ ).

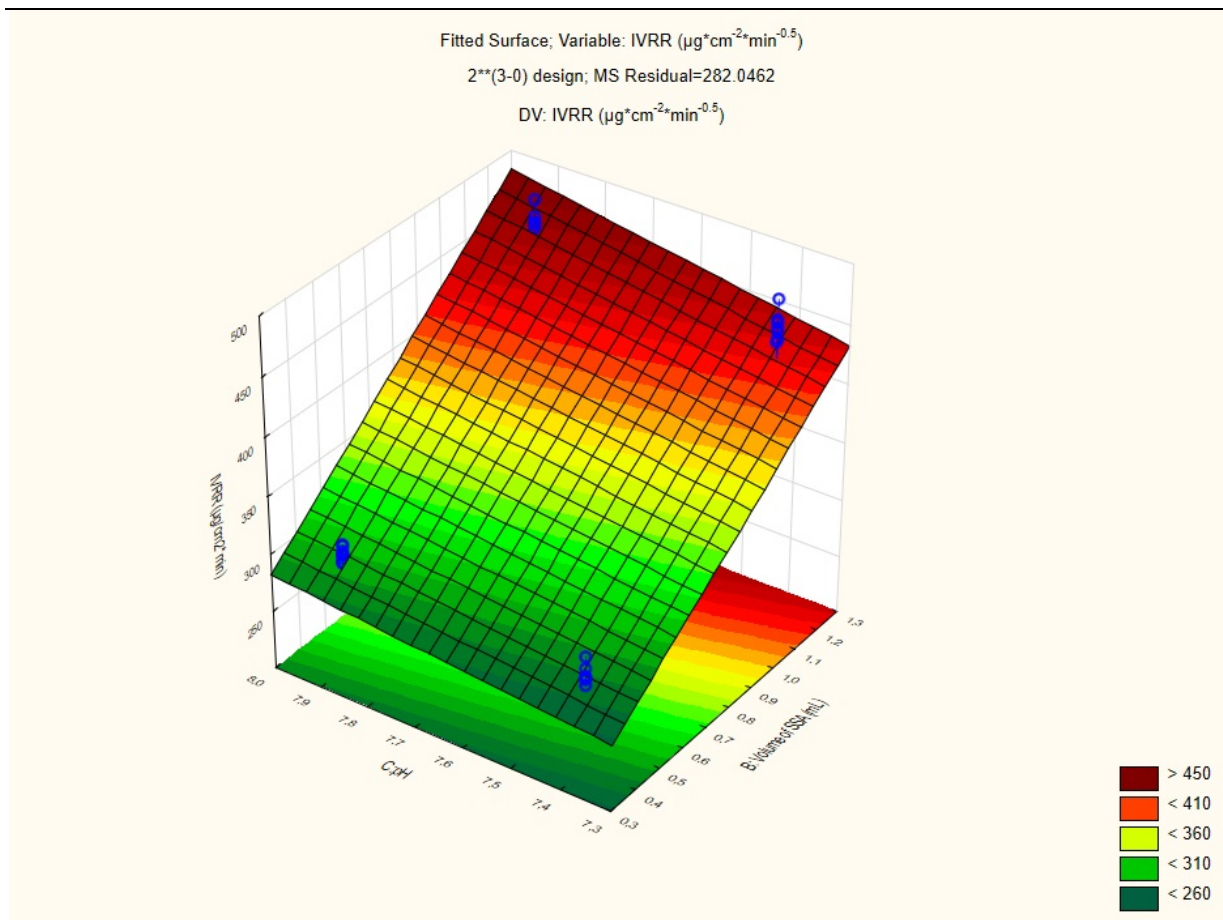

**Figure S2.** Response surface (3D) plot (X2-X3-Y1) of the effects of variables on in vitro release rate (IVRR) ( $\mu\text{g}\cdot\text{cm}^{-2}\cdot\text{min}^{-0.5}$ ).

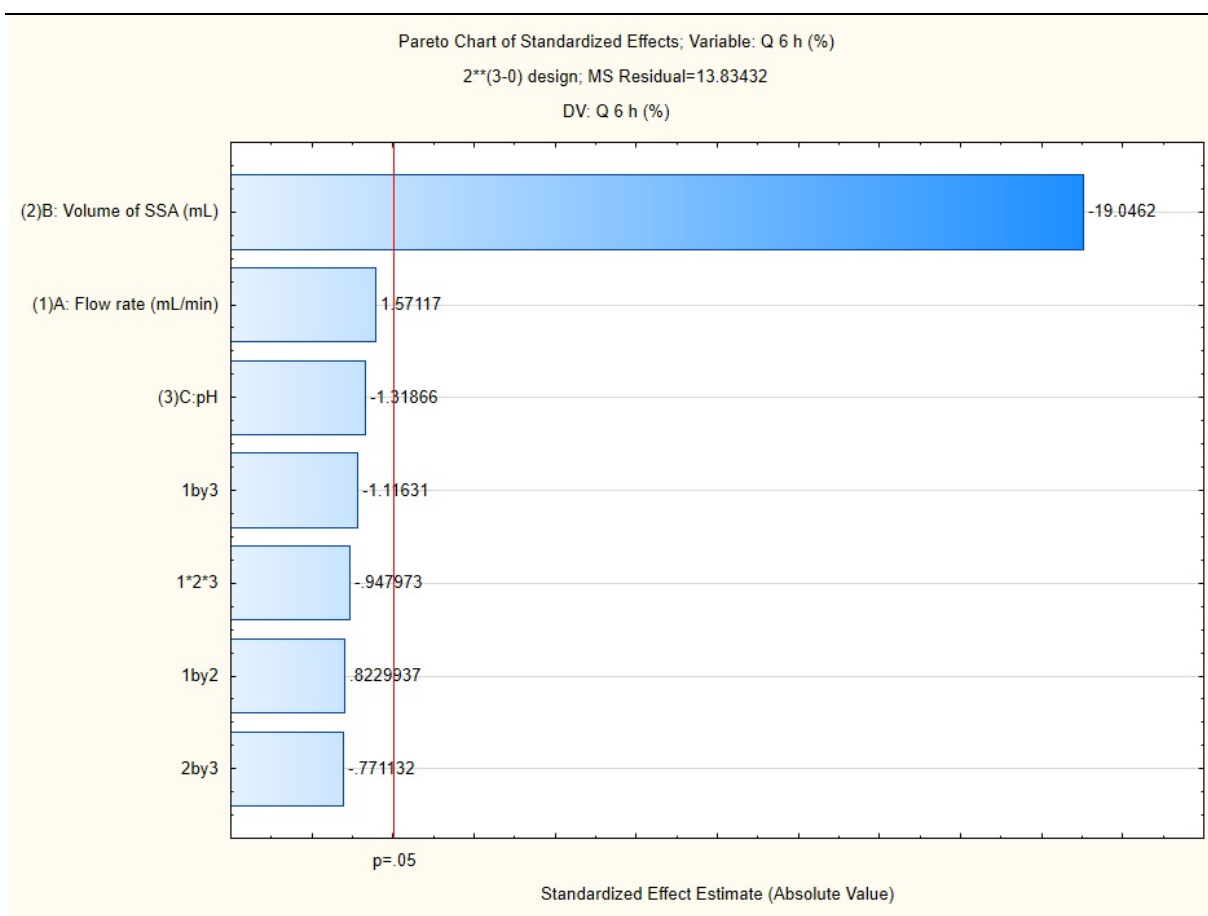

**Figure S3.** Standard Pareto chart showing the effects of independent variables on release efficiency in 6 hours (%).

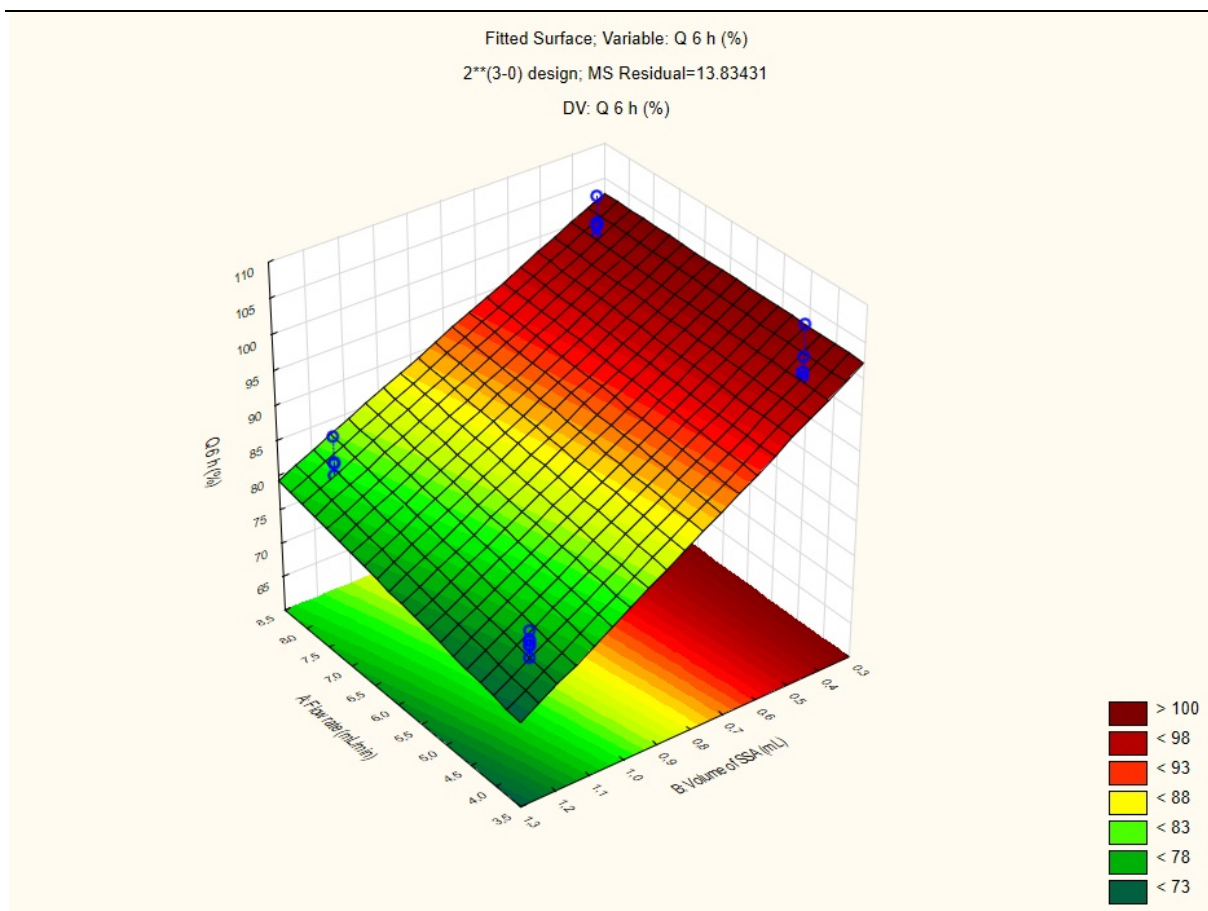

**Figure S4.** Response surface (3D) plot (X1-X2-Y1) of the effects of variables on release efficiency in 6 hours (%).

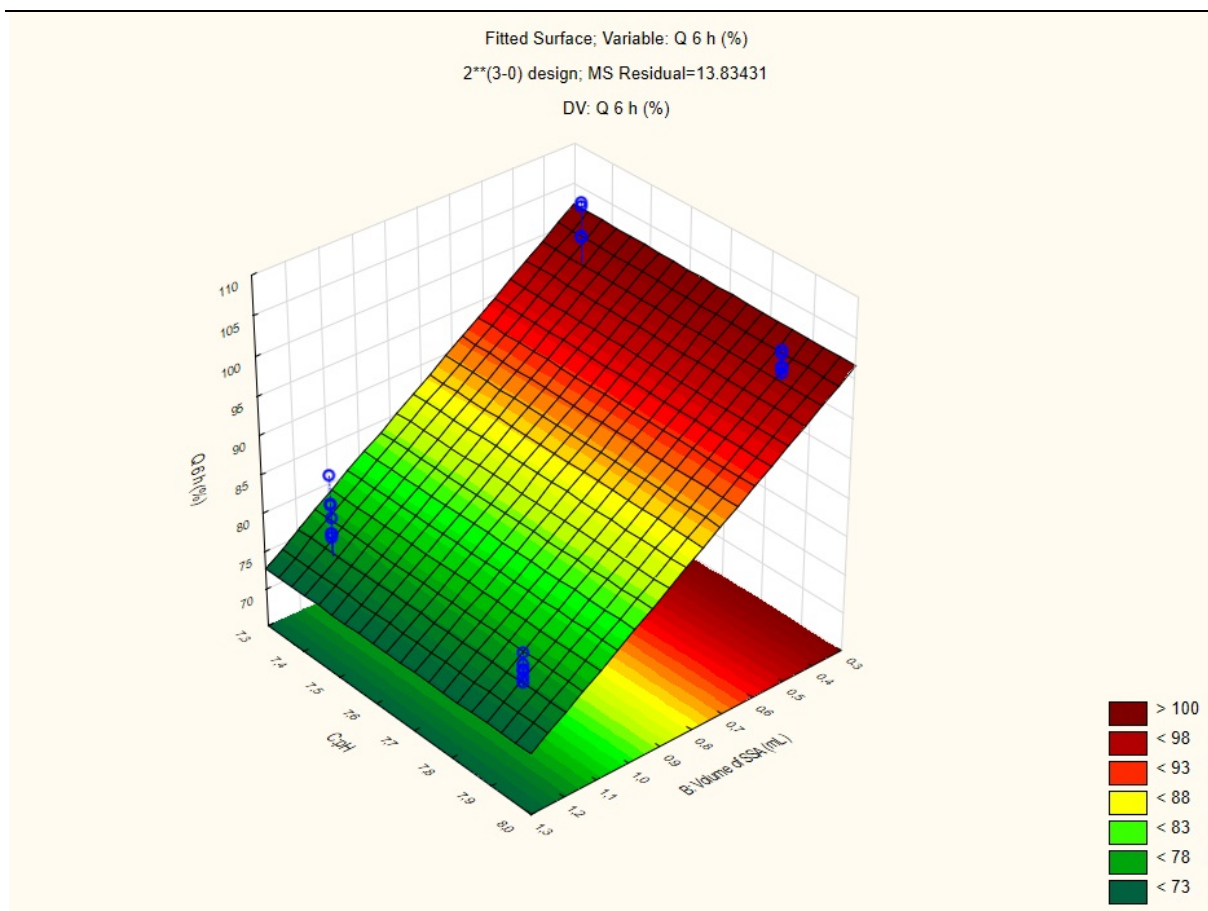

**Figure S5.** Response surface (3D) plot (X1-X3-Y1) of the effects of variables on release efficiency in 6 h (%).

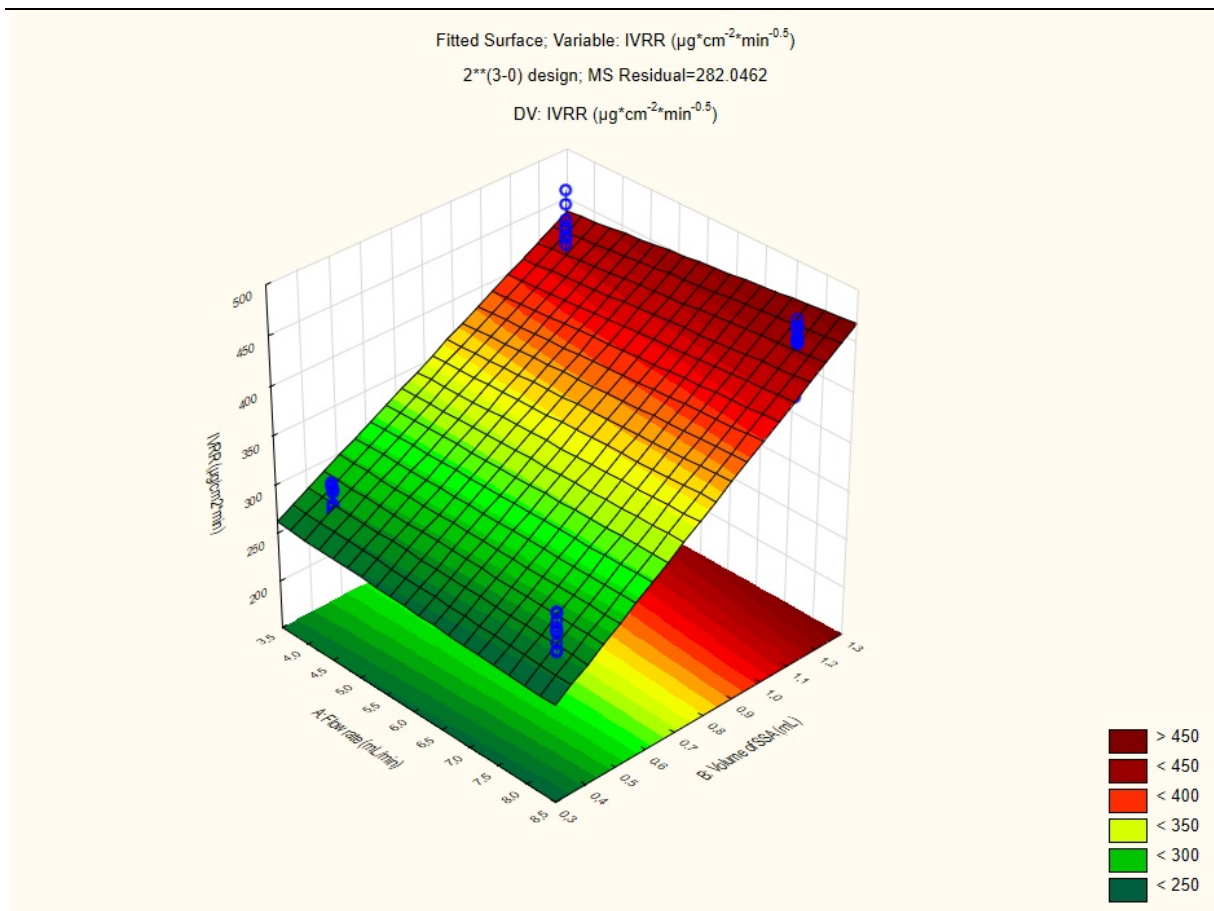

**Figure S6.** Response surface (3D) plot (X1-X2-Y1) of the effects of variables on in vitro release rate (IVRR) ( $\mu\text{g}\cdot\text{cm}^{-2}\cdot\text{min}^{-0.5}$ ).

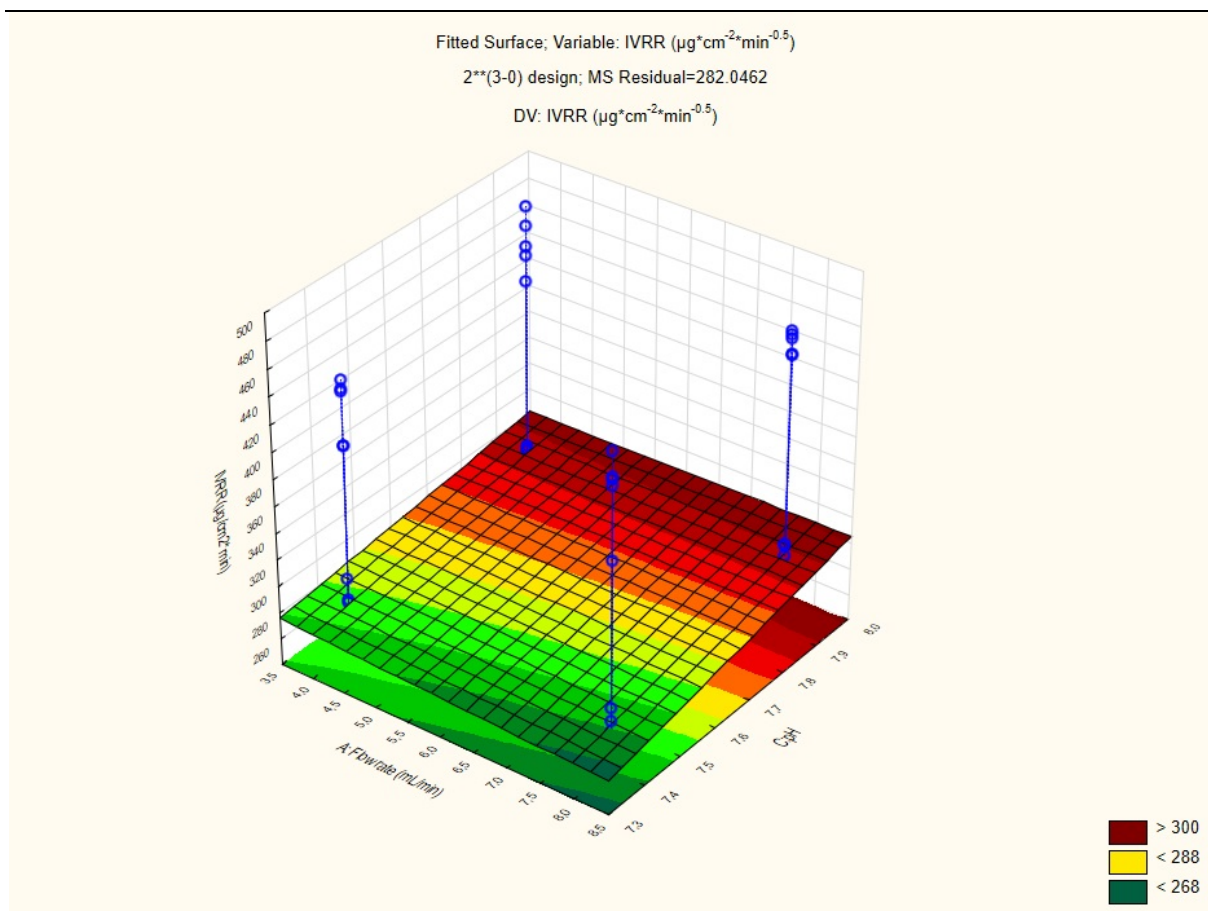

**Figure S7.** Response surface (3D) plot (X1-X3-Y1) of the effects of variables on in vitro release rate (IVRR) ( $\mu\text{g}\cdot\text{cm}^{-2}\cdot\text{min}^{-0.5}$ ).



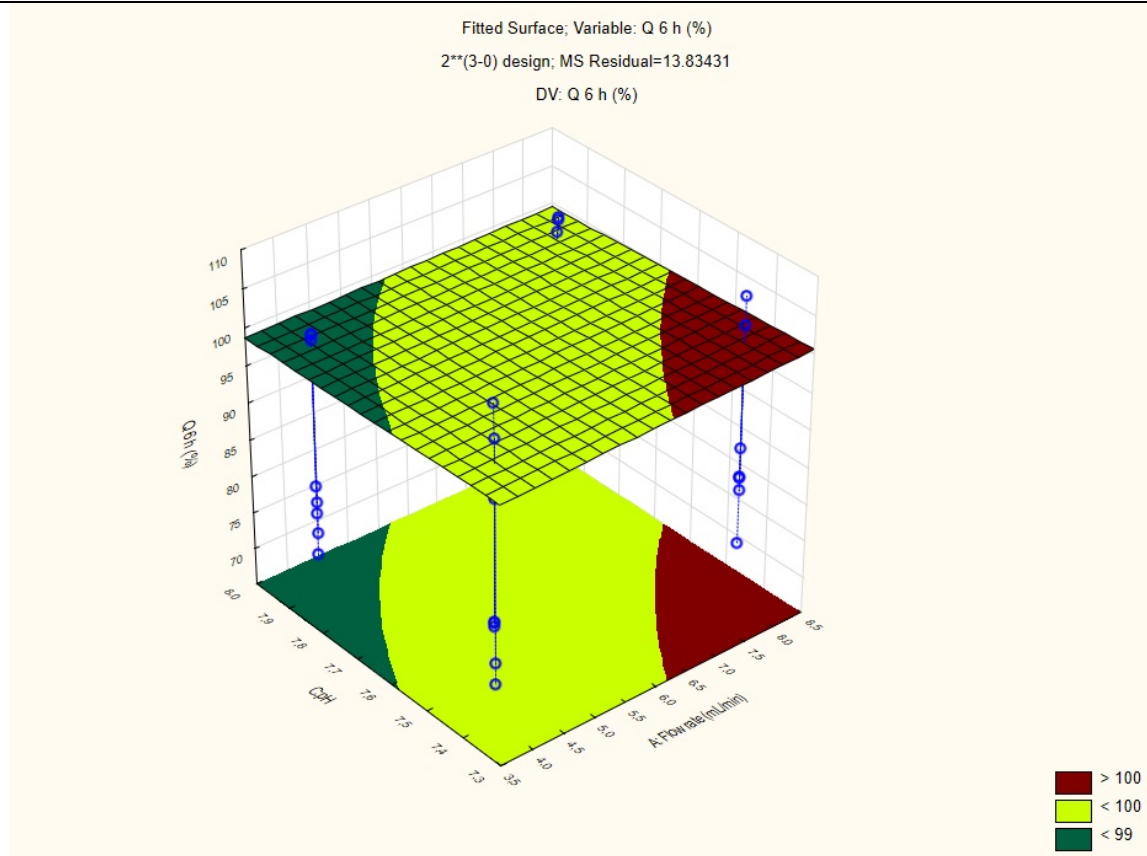

**Figure S8.** Response surface (3D) plot (X2-X3-Y1) of the effects of variables on release efficiency in 6 h (%).

**Table S1.** Confirmation of the sink condition.

| Parameters                                                                                          | USP Apparatus IV |
|-----------------------------------------------------------------------------------------------------|------------------|
| Maximum dosage strength (%)                                                                         | 2                |
| Volume of the cell (mL)                                                                             | 10.2             |
| Maximum sample weight (mg)                                                                          | 1300             |
| Maximum concentration of the API in the receptor medium (mg/mL)                                     | 2.6              |
| Solubility of API in pH 7.4 PBS mg/mL                                                               | 8.2 ± 0.7*       |
| Solubility of API in pH 7.4 PBS divided maximum concentration of the API in the receptor medium (-) | 3.2              |

\*M. Miranda, A. A. C. C. Pais, C. Cardoso, C. Vitorino, aQbD as a platform for IVRT method development—A regulatory oriented approach. International Journal of Pharmaceutics. 572, (2019) 118695. <https://doi.org/10.1016/j.ijpharm.2019.118695>.

**Table S2.** Osmolality of the applied media in the in vitro release test (IVRT) studies.

| Name of the Medium | Osmolality of the Medium<br>Mean (mOsmol/kg) |
|--------------------|----------------------------------------------|
| pH 7.4 PBS         | 279.5                                        |
| pH 6.9 PBS         | 274.5                                        |
| pH 7.9 PBS         | 277.0                                        |
| pH 7.4 PBS + NaCl  | 769.3                                        |
| pH 7.4 PBS - NaCl  | 99.3                                         |



**Table S3.** Effect of the pH for in vitro release rate (IVRR). Statistical parameters – one-way analysis of variance test.

| Effect    | Effect (F/R) | Sum of Squares | Degr. Of Freedom | Mean Square | Den. Syn. Error df | Den. Syn. Error MS | F        | p        |
|-----------|--------------|----------------|------------------|-------------|--------------------|--------------------|----------|----------|
| Intercept | Fixed        | 1230515        | 1                | 1230515     | 2,00067            | 1796,229           | 685,0547 | 0,001454 |
| pH        | Random       | 3604           | 2                | 1802        | 13,00000           | 87,250             | 20,6551  | 0,000092 |
| Error     |              | 1134           | 13               | 87          | -                  | -                  | -        | -        |

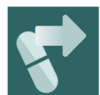

**Table S4.** Updated failure mode effects analysis (FMEA) table after the investigation of CMPs. F probability of occurrence of the excursion = 1 (low), 5 (high); S severity of excursion = 1 (low), 5 (high); D detection of excursion = 1 (easy), 5 (hard); RPN risk priority number =  $F \times S \times D$ ; 1–29 low risk (green), 30–59 medium risk (yellow), 60–125 high risk (orange).

| Method parameter             | Critical Method attributes                                                         | Cause Of the Deviation              | Effect of the Deviation                                         | F (occurrence) | S (severity) | D (perceptibility) | RPN | Action/Strategy of Risk Decrease                                         |
|------------------------------|------------------------------------------------------------------------------------|-------------------------------------|-----------------------------------------------------------------|----------------|--------------|--------------------|-----|--------------------------------------------------------------------------|
| <b>Release test</b>          |                                                                                    |                                     |                                                                 |                |              |                    |     |                                                                          |
| Ionic strength of the medium | min. 70% (Q)-6 h                                                                   | The gelling agent is HPMC           | Release might change                                            | 4              | 2            | 4                  | 32  | According to OFAT studies (see Section 3.4.3).                           |
| Ionic strength of the medium | 6 time points should be obtained in the linear portion of the drug release profile | The gelling agent is HPMC           | Release might change                                            | 4              | 1            | 4                  | 16  | According to OFAT studies (see Section 3.4.3).                           |
| pH of the medium             | min. 70% (Q)-6 h                                                                   | Changing the pH of the medium       | RSD might be increasing. Outliers above 70%.                    | 3              | 5            | 4                  | 60  | According to OFAT studies (see Section 3.4.3) and DoE (see Section 3.5.) |
| Membrane type                | min. 70% (Q)-6 h                                                                   | Different membrane and manufacturer | The membrane should be inert and not be rate-limiting to active | 5              | 1            | 3                  | 15  | According to membrane inertness study, see Section 3.4.1.                |



|                                      |                                                                                    | substance release                                                                                    |                                                                                  |   |   |   |    |                                                                           |  |
|--------------------------------------|------------------------------------------------------------------------------------|------------------------------------------------------------------------------------------------------|----------------------------------------------------------------------------------|---|---|---|----|---------------------------------------------------------------------------|--|
| Rate of flow                         | min. 70% (Q)-6 h                                                                   | The increase in the rate of flow, maintaining concentration gradient, results in faster drug release | Release kinetic might change. Increase or decrease of RSD                        | 5 | 1 | 3 | 15 | According to OFAT studies (see Section 3.4.2.) and DoE (see Section 3.5.) |  |
| Rate of flow                         | 6 time points should be obtained in the linear portion of the drug release profile | Quicker flowing causes quicker release                                                               | Release kinetic might change                                                     | 5 | 1 | 3 | 15 | According to OFAT studies (see Section 3.4.2.) and DoE (see Section 3.5.) |  |
| Sample weight (0.4 mL or 1.2 mL SSA) | min. 70% (Q)-6 h                                                                   | Different size of SSA                                                                                | Sample weight increasing, therefore release kinetic change / release rate change | 5 | 5 | 3 | 75 | According to OFAT studies (see Section 3.4.2.) and DoE (see Section 3.5.) |  |
| Sample weight (0.4 mL or 1.2 mL SSA) | 6 time points should be obtained in the linear portion of the drug release profile | Different size of SSA                                                                                | Sample weight increasing, therefore release kinetic change / release rate change | 5 | 5 | 3 | 75 | According to OFAT studies (see Section 3.4.2.) and DoE (see Section 3.5.) |  |



|                               |                                                                                    |                                                   |                                                                       |   |   |   |    |                                                                                                                                                     |
|-------------------------------|------------------------------------------------------------------------------------|---------------------------------------------------|-----------------------------------------------------------------------|---|---|---|----|-----------------------------------------------------------------------------------------------------------------------------------------------------|
| Individual flow rate of cells | min. 70% (Q)-6 h                                                                   | The release of API might be changing cell by cell | RSD might be increasing. Outliers above 70%.                          | 3 | 3 | 5 | 45 | Controlled parameter: it was prescribed to measure the flow rate cell by cell of the release and calculate the release with the measured flow rate. |
| Individual flow rate of cells | 6 time points should be obtained in the linear portion of the drug release profile | The release of API might be changing cell by cell | RSD might be increasing. Fluctuating release curve is caused by RSD % | 3 | 3 | 5 | 45 | Controlled parameter: it was prescribed to measure the flow rate cell by cell of the release and calculate the release with the measured flow rate. |
| Individual flow rate of cells | RSDConc $\leq$ 10 % (6 vessels)                                                    | The release of API might be changing cell by cell | Fluctuating release curve is caused by RSD %                          | 3 | 3 | 5 | 45 | Controlled parameter: it was prescribed to measure the flow rate cell by cell of the release and calculate the release with the measured flow rate. |



|                            |                                                                                    |                                                                                                      |                                                                                     |   |   |   |    |                                                                                                                     |
|----------------------------|------------------------------------------------------------------------------------|------------------------------------------------------------------------------------------------------|-------------------------------------------------------------------------------------|---|---|---|----|---------------------------------------------------------------------------------------------------------------------|
| API %                      | min. 70% (Q)-6 h                                                                   | Sink conditions have to be ensured in the receptor medium                                            | Limited drug solubility effects can play a major role in the control of API release | 5 | 1 | 3 | 15 | According to discriminatory power studies, see Section 3.7. The LOQ was measured (0.12 µg/mL) and adequate for ATP. |
| API %                      | 6 time points should be obtained in the linear portion of the drug release profile | The method's requirement is to detect different IVRRs according to the strength of the formulations. | The IVRT method might not be sensitive.                                             | 4 | 1 | 3 | 12 | According to discriminatory power studies, see Section 3.7.                                                         |
| Composition of the product | min. 70% (Q)-6 h                                                                   | Gelling agent type                                                                                   | Release might change                                                                | 4 | 3 | 3 | 36 | Fixed matrix was prescribed.                                                                                        |

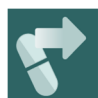**Table S5.** Sensitivity of the in vitro release test (IVRT) method: in vitro release rate (IVRR) of the diclofenac sodium 0.5, 1 and 2 % hydrogel measured with USP apparatus IV.

| Diclofenac Sodium Concentration % | IVRR $\mu\text{g} \cdot \text{cm}^{-2} \cdot \text{min}^{-0.5}$ | Mean of the IVRR $\mu\text{g} \cdot \text{cm}^{-2} \cdot \text{min}^{-0.5}$ | SD of the IVRR $\mu\text{g} \cdot \text{cm}^{-2} \cdot \text{min}^{-0.5}$ | RSD of the IVRR % |
|-----------------------------------|-----------------------------------------------------------------|-----------------------------------------------------------------------------|---------------------------------------------------------------------------|-------------------|
| 0.5                               | 137.34                                                          | 144.54                                                                      | 10.50                                                                     | 7.26              |
|                                   | 160.91                                                          |                                                                             |                                                                           |                   |
|                                   | 138.12                                                          |                                                                             |                                                                           |                   |
|                                   | 152.88                                                          |                                                                             |                                                                           |                   |
|                                   | 133.55                                                          |                                                                             |                                                                           |                   |
|                                   | 144.43                                                          |                                                                             |                                                                           |                   |
| 1                                 | 309.39                                                          | 290.55                                                                      | 10.92                                                                     | 3.76              |
|                                   | 289.96                                                          |                                                                             |                                                                           |                   |
|                                   | 292.30                                                          |                                                                             |                                                                           |                   |
|                                   | 284.38                                                          |                                                                             |                                                                           |                   |
|                                   | 276.42                                                          |                                                                             |                                                                           |                   |
|                                   | 290.86                                                          |                                                                             |                                                                           |                   |
| 2                                 | 573.25                                                          | 555.65                                                                      | 50.14                                                                     | 9.02              |
|                                   | 595.43                                                          |                                                                             |                                                                           |                   |
|                                   | 477.18                                                          |                                                                             |                                                                           |                   |
|                                   | 602.49                                                          |                                                                             |                                                                           |                   |
|                                   | 511.19                                                          |                                                                             |                                                                           |                   |
|                                   | 574.37                                                          |                                                                             |                                                                           |                   |

**Table S6.** The discriminatory power of the in vitro release test (IVRT) method calculated the upper and the lower limits of the 90% confidence interval.

| Diclofenac Sodium Concentration (%) of the Test / Reference Product | 90 CI%      |             | Decision      |
|---------------------------------------------------------------------|-------------|-------------|---------------|
|                                                                     | Lower limit | Upper limit |               |
| 0.5/1 %                                                             | 47.0        | 53.8        | inequivalence |
| 2/1 %                                                               | 174.9       | 207.4       | inequivalence |
